# Supplementary material
Source: Research Square preprint supplement (doi:10.21203/rs.3.rs-9136961/v1)
Supplement: Supplementary file 1 [file 530b48078601eb47be0ca74a.docx]

Additional File 3

Code System

Note: The Code System were translated using Copilot, so there may be some semantic differences.

Code System - Participants

Perception/Description of the Service

- Content
- Open exchange
- With professionals
- With like-minded individuals, honesty
- Safe place
- Professional support
- Self-help group
- Hub function
- Recommendation
- Yes
- No

Access to the Service

- Questionnaire on flyer
- Referral pathways
- Suggestion from family support
- Suggestion from GDA
- Own initiative
- Website
- Brochure/Flyer/Poster
- Reasons for utilization
- Barriers to utilization
- Illness symptoms
- Awareness of illness
- Lack of information
- Availability
- Stigma
- Organizational (time, childcare, location)
- None
- Facilitation of utilization
- Organization/motivation by another person
- Sufficient information
- Costs
- Personal contact
- Framework conditions of the service
- Availability

Perceived Psychosocial Burdens

- At the beginning of the service
- End of the service

Utilization of the Service

- Regularity of participation
- Continuation of participation

Evaluation of the Service

- Framework conditions
- Positive
- Rules/structures
- Professionals (GL/PT)
- Composition of the group
- Duration of the session
- Scope of the service
- Group size
- Frequency
- Day of the week
- Time
- Geographical location
- Premises
- Negative
- Rules/structures
- Composition of the group
- Professionals (GL/PT)
- Duration of the session
- Scope of the service
- Group size
- Frequency
- Day of the week
- Time
- Geographical location
- Premises
- Process, strategies, exercises
- General
- No exercises/strategies
- Positive
- Conversation design
- Interventions by GL/PT
- Open exchange
- Exercises
- Physical exercises
- Other exercises
- Content inputs
- Negative
- Intervention/moderation/structuring
- Content inputs
- Disturbing/irritating/not helpful

Benefits

- Effectiveness
- Practical tips
- Safety net/security
- Structuring everyday life
- Reduction of psychosocial burdens
- Unclear
- Not at all
- A little
- Very
- Rating on a scale of 1-5
- 1
- 2
- 3
- 4
- 5
- Areas of impact
- Relief through exchange (with like-minded individuals)
- Confidence in dealing with the baby/toddler
- Social inclusion/less loneliness
- Development of a network
- Improvement of self-efficacy and self-confidence
- Awareness of illness and stabilization
- Partnership, family
- Evaluation of one's own motherhood
- Parent-child relationship
- Self-acceptance and self-perception
- Coping with life changes due to the child
- Sustainability – long-term support through the service
- More positive self-image
- Reduction of stigma
- Learned interventions/acquired know-how
- Point of contact
- Long-term exchange (WhatsApp group)

Expectations/Hopes Regarding the Service

- Stated expectations/hopes
- Fulfilment of expectations/hopes
- Non-fulfilment of expectations/hopes
- Unresolved points
- Further support service planned?
- Yes
- No

Additional Measures

- Family support
- Psychiatrist/clinic/inpatient stay
- Medication therapy
- Individual therapy PT/psychologist
- Group therapy
- Midwife
- Family support through early help
- Short-term support
- Playgroups, mom meetups …
- Other?
- Further information
- Mutual influence of measures
- Advantage/benefit of the evaluated service compared to other measures
- Disadvantages of the evaluated service
- Effects of additional measures
- Barriers

Feedback on Participant Observation

Suggestions for changes/improvements

Concluding remarks

Quote idea

Unclear coding

Check with audio file

Code System - Professionals

Austria: General Need/Utilization

- Need for psychosocial support for accompanied mothers
- Assessment of need
- Childcare
- Required services
- PT with experience in early childhood
- Psychotherapy
- Psychiatry (outpatient, inpatient)
- Orientation talks (PT, psychology)
- Midwives
- Crisis places
- Parent-child services
- Parent-child psychotherapy
- Acute psychiatric mother-child places
- Mother-child rehab/cure
- Self-help groups
- Bonding, baby care
- Specific mother groups
- Counselling services
- Combination of various services
- Referral of a psychosocial service
- Indication
- Contraindication
- Reaction/acceptance
- Willingness
- Concerns
- Need for clarification/information
- Barriers to utilization of psychosocial services
- Concern about child protection, control
- Financing
- Societal/family pressure
- Negative prior experiences with PT
- Lack of "insight" regarding the problem
- Lack of knowledge/uncertainty
- Compatibility with children
- Stigma
- Availability
- Lack of services in rural areas
- Lack of service
- Waiting time/not sufficient
- Facilitation of utilization
- Reduction of stigma
- (Organizational) support
- Tailored services for the target group
- Positive testimonials
- Promotion of mental health literacy
- Rapid availability
- Ensuring financing
- Networking/collaboration of services
- Acceptance depending on the type of psychosocial service
- Medical vs. therapeutic services
- Framework conditions (individual vs. group setting)
- Service closely linked to early help

Perception/Description of the Evaluated Service

- Description and goals
- Difference to long-term therapy/other service
- Requirements and challenges
- Preparation/follow-up of sessions
- Interventions
- Adaptations
- Impact on burdens
- Areas of impact
- Self-acceptance/self-perception
- Destigmatization
- Life changes due to the child
- Areas of impact \ practical tips
- Social inclusion/less loneliness
- Relief through exchange (with like-minded individuals)
- Parent-child relationship
- Partnership/family
- Evaluation of one's own motherhood
- Awareness of illness and stabilization
- Confidence in dealing with the baby/toddler
- Improvement of self-efficacy/self-care
- Development of a network
- Effectiveness

Need/Utilization of the Evaluated Service

- Need compared to available service
- Utilization
- Duration
- Continuation
- Waiting list follow-up
- Premature termination
- Specific aspects – evaluated service
- Proportion accompanied by early help
- Referral
- Connection to early help during the service
- Perceived differences

Mothers' Response to the Evaluated Service

- Indication
- Contraindication
- Acceptance
- Willingness
- Concerns
- Need for clarification/information
- Facilitation of utilization
- Reasons for non-utilization
- Need for improvement/optimization

Interaction of Early Help and Psychosocial Services

- Evaluated service becomes more effective
- Relief for families
- Relief for family support or professionals
- Family support becomes more effective
- Facilitation/support of initiation
- Qualified support
- Interdisciplinary view of the family

Other Feedback

- Personal assessment/reflection
- Wishes/suggestions
- General (Austria-wide)
- Evaluated service

Quote idea

Unclear coding
