# Supplementary material
Source: Research Square preprint supplement (doi:10.21203/rs.3.rs-9136961/v1)
Supplement: Supplementary file 2 [file c137598f97e155e9caa8e05a.docx]

Additional File 2
Screening instruments

The EPDS includes ten items, each scored from zero to three. The total score, ranging from 0 to 30, categorizes the likelihood of depression into low, moderate, and high. Scores ≥13 indicate a 60-100% probability of depression, though high scores necessitate further clinical assessment and do not equate to a definitive diagnosis. The EPDS assesses current mood but cannot predict future depression or substitute for psychiatric evaluation.

The GAD-7 consists of seven items, each rated on a four-point scale, assessing anxiety severity over the past two weeks. Total scores range from 0 to 21, categorized into minimal, mild, moderate, and severe anxiety symptoms. Higher scores correspond to more severe anxiety.

The PBQ includes four scales assessing delayed attachment, rejection and anger, fear, and danger/abuse of the child. Each item is scored from zero to five. The total score identifies potential bonding disorders, signalling when specialist consultation is warranted. The PBQ aids in assessing conditions requiring treatment but cannot diagnose disorders.
