# Supplementary material
Source: Research Square preprint supplement (doi:10.21203/rs.3.rs-9136961/v1)
Supplement: Supplementary file 3 [file cdad106069860daa181056cd.docx]

Additional File 1
Interview Guidelines

Note: The Interview Guidelines were translated using Copilot, so there may be some semantic differences. Below you will find examples of the interview guidelines for the participants in Tyrol and Vienna. A separate interview guide was created for the practitioners, which can be requested if required.

Participants Tyrol

Individual Interview at the Conclusion of the Intervention – Participants from TYROL

Introductory Questions

- How did you come across the service? What or who made you aware of it?
- Did you use the shortened EPDS questionnaire on the flyer?
- Why did you take advantage of the service?
- Did you hesitate or were there any obstacles to taking advantage of the service? If yes: What would have made it easier for you to take advantage of the service?
- How were you feeling at that time? What burdens/challenges did you experience before the service? What was already supportive for you back then?
- (Optional: What was particularly supportive and helpful during this time (while participating in the service)?)

Specific Questions about the Service

- How would you describe the service? (optional follow-up: How did you perceive it?)
- Did you take advantage of all 5 sessions? How often did the appointments take place?
- Did your psychological burden decrease as a result of the service? To what extent? not at all – a little – very much?
- In relation to which challenges or burdens was the service particularly helpful?
- What did you find particularly helpful?
- Can you remember a situation or exercise that was particularly helpful?
- How satisfied were you with the framework conditions, such as the duration and frequency of the sessions, the timing, and the location of the service?
- What was disturbing or irritating for you? Can you remember a situation or exercise that was not very helpful or unpleasant?
- Which contents of the service were not helpful in your situation? Why?
- Were additional measures taken during the course (e.g., medication, additional psychosocial services)? If yes: What is the specific benefit of the service compared to other measures for you?
- Were the expectations and hopes for the service fulfilled? In what way yes? In what way no?
- How helpful did you find the service in general? (rating on a scale of 1–5)

Concluding Questions

- How are you currently feeling? What has changed (improved or worsened)? Which burdens have improved? Which challenges still exist? Have new burdens arisen?
- What else would you have wished for? Do you plan to take advantage of another support service?
- Do you find the continuation of psychotherapeutic treatment after the 5 sessions sensible or necessary (or was the treatment continued after the 5 sessions)?
- Would you recommend the service? If yes: How would you recommend the service to a friend or acquaintance?
- Is there anything else you would like to share with us?

Participants Vienna

Individual Interview at the Conclusion of the Intervention – Participants from VIENNA

Introductory Questions

- How did you come across the service? What or who made you aware of it?
- Did you hesitate to take advantage of the service? If yes: What would have made it easier for you to take advantage of the service?

Specific Questions about the Service

- How would you describe the service "Mutterseelen…gemeinsam"? (follow-up: How did you perceive it?)
- How satisfied were you with the framework conditions, such as the size of the group, the duration and frequency of the sessions, the timing, the structure, and the location of the service?
- Did your psychological burden decrease as a result of the service? To what extent? not at all – a little – very much?
- In relation to which challenges or burdens was the service particularly helpful? Possible topics: awareness of illness and stabilization, parent-child relationship, development of a network, psychological-emotional well-being, resources, confidence in dealing with the baby/toddler, evaluation of one's own motherhood
- What did you find particularly helpful?
- Can you remember a situation or exercise that was particularly helpful?
- What was disturbing or irritating for you? Can you remember a situation or exercise that was not very helpful or unpleasant?
- Which contents of the service were not helpful in your situation? Why?
- Were additional measures taken during the course (e.g., medication, additional psychosocial services)? If yes: What is the specific benefit of the service compared to other measures for you?
- Were the expectations and hopes for the service fulfilled? In what way yes? In what way no?
- How helpful did you find the service in general? (rating on a scale of 1–5)
- What can the group service that individual support (e.g., early help family support) cannot service? What cannot?

Concluding Questions

- How are you currently feeling? What has changed (improved or worsened)? Which burdens have improved? Which challenges still exist? Have new burdens arisen?
- What do you take away from the group that could also help you in the future?
- What else would you have wished for? Do you plan to take advantage of another support service?
- Would you recommend the service? If yes: How would you recommend the service to a friend or acquaintance?
- Is there anything else you would like to share with us?
